# Supplementary material
Source: HighWire-hosted journal article supplement (https://www.highwirestage.com/highwire/filestream/60730/field_highwire_adjunct_files/0/17-01254.pdf)
Supplement: 17-01254.pdf [file 17-01254.pdf]

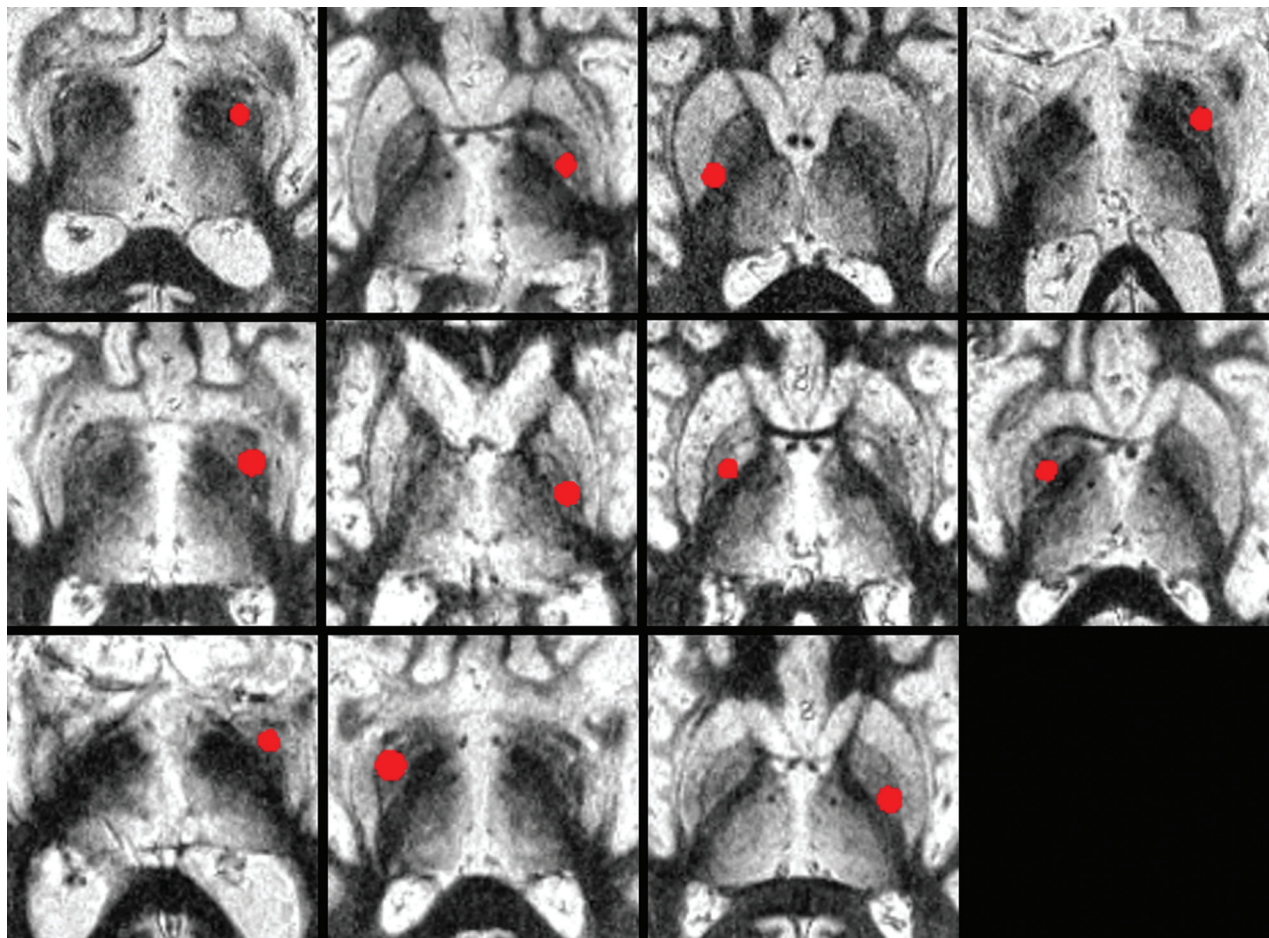

**ON-LINE FIGURE.** Axial fast gray matter acquisition T1 inversion recovery image for all 11 patients illustrating the volume of tissue activated (red) in the native space of the patient.
